# Supplementary material for: Topologically Associated Domains Delineate Susceptibility to Somatic Hypermutation
Source: PubMed Central journal article supplement — Cell Rep. Author manuscript; Available in PMC 2020 Jan 24. (PMC6980758; doi:10.1016/j.celrep.2019.11.039), 2019-12-17
Supplement: NIHMS1547106-supplement-5.pdf [file NIHMS1547106-supplement-5.pdf]

A

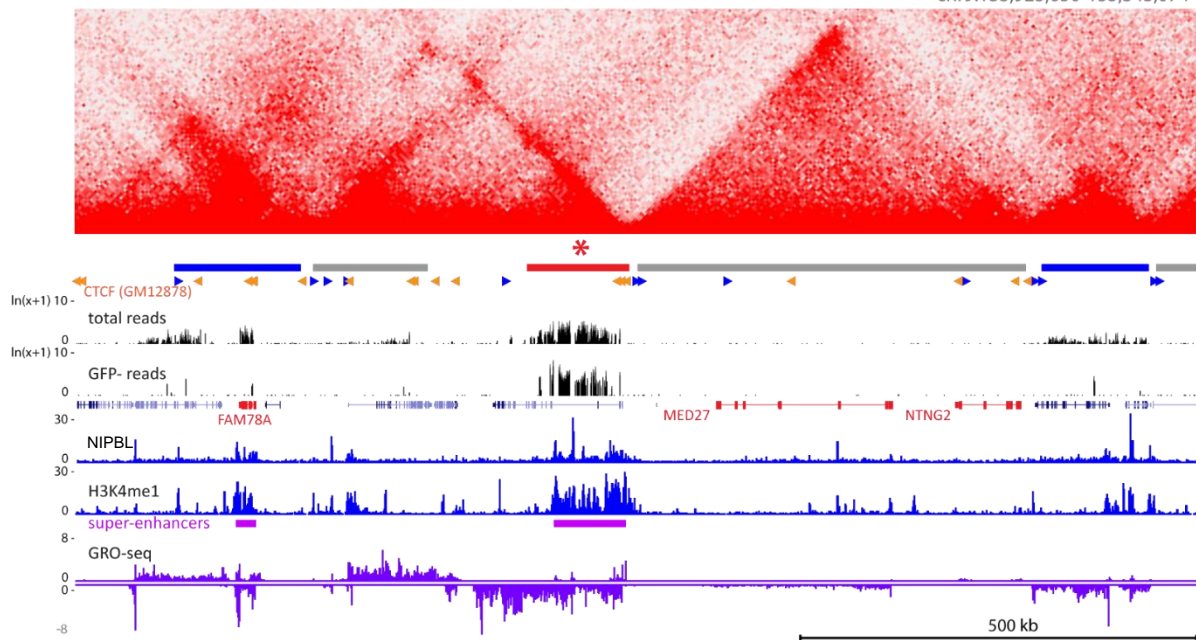

B

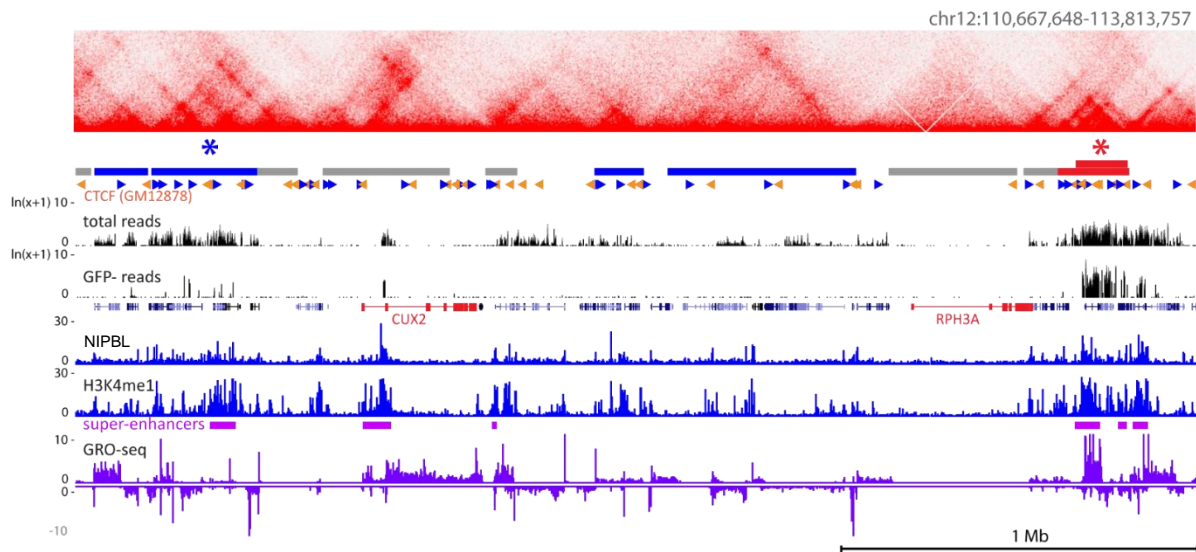

C

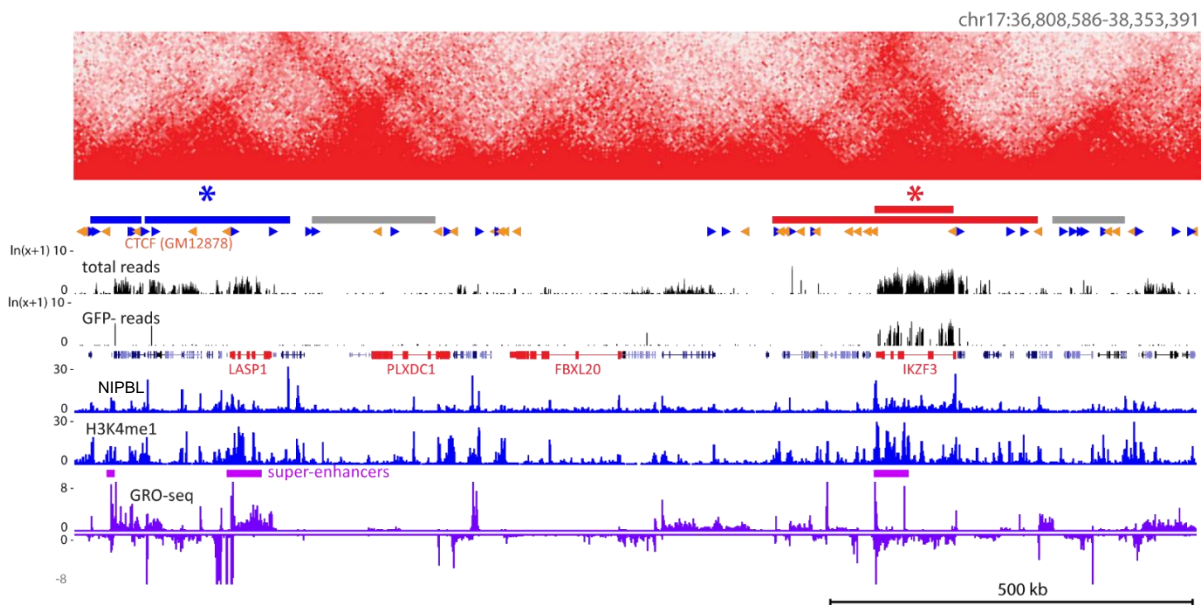

D

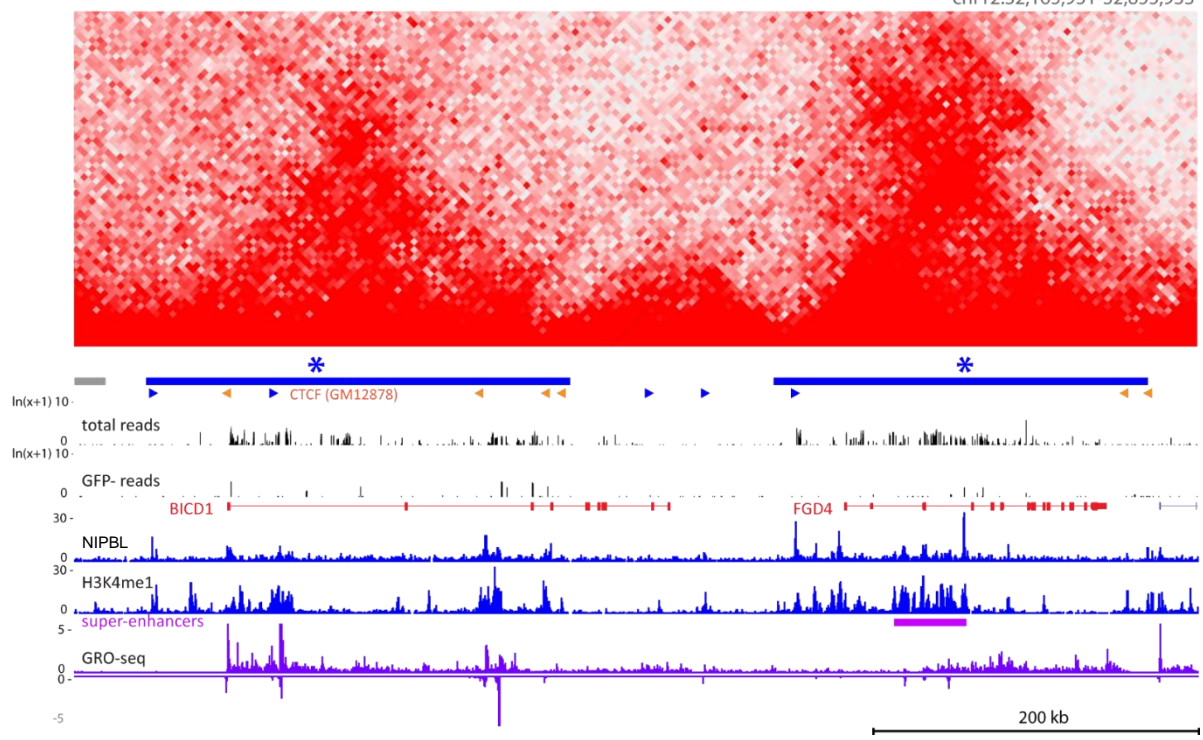

E

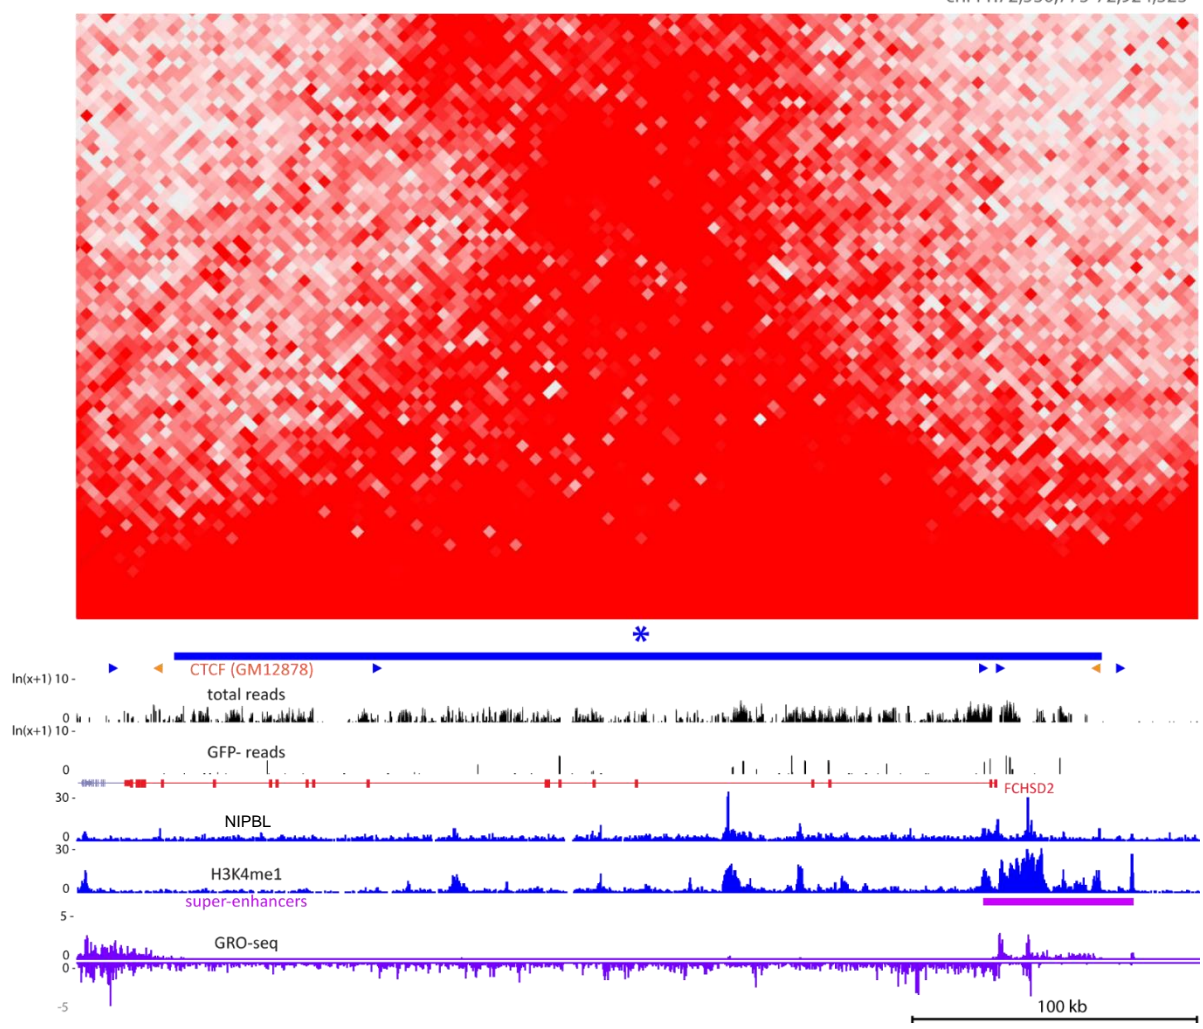



F

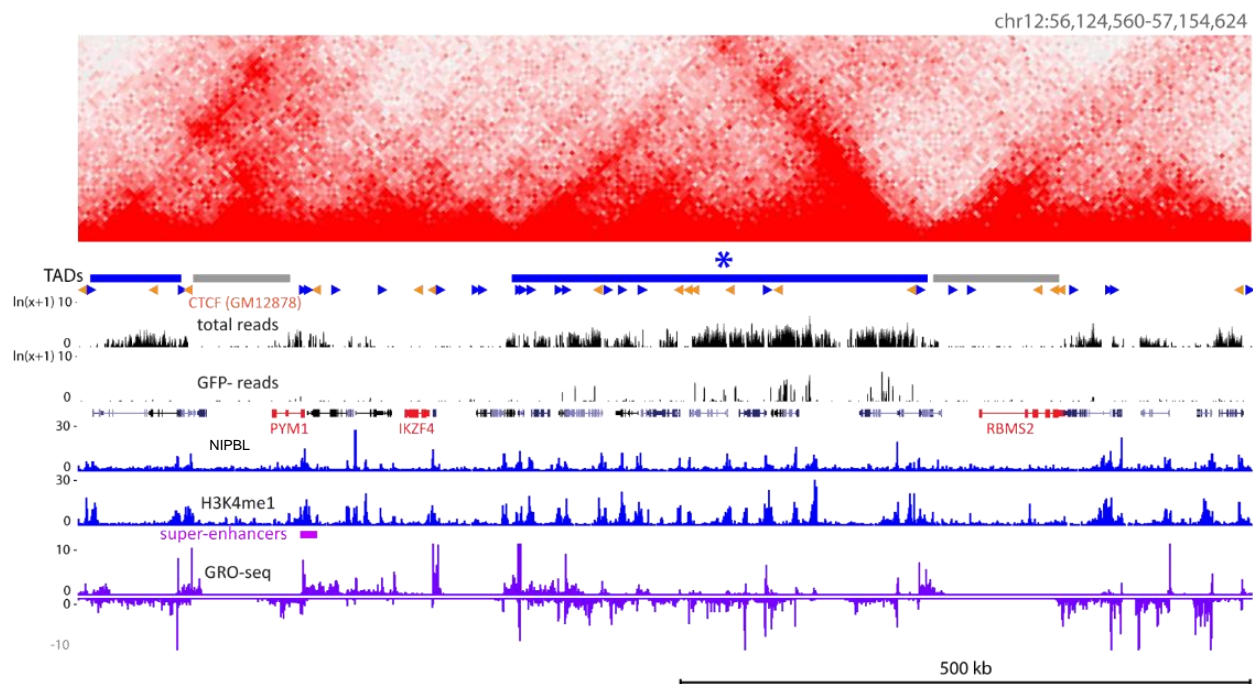

G

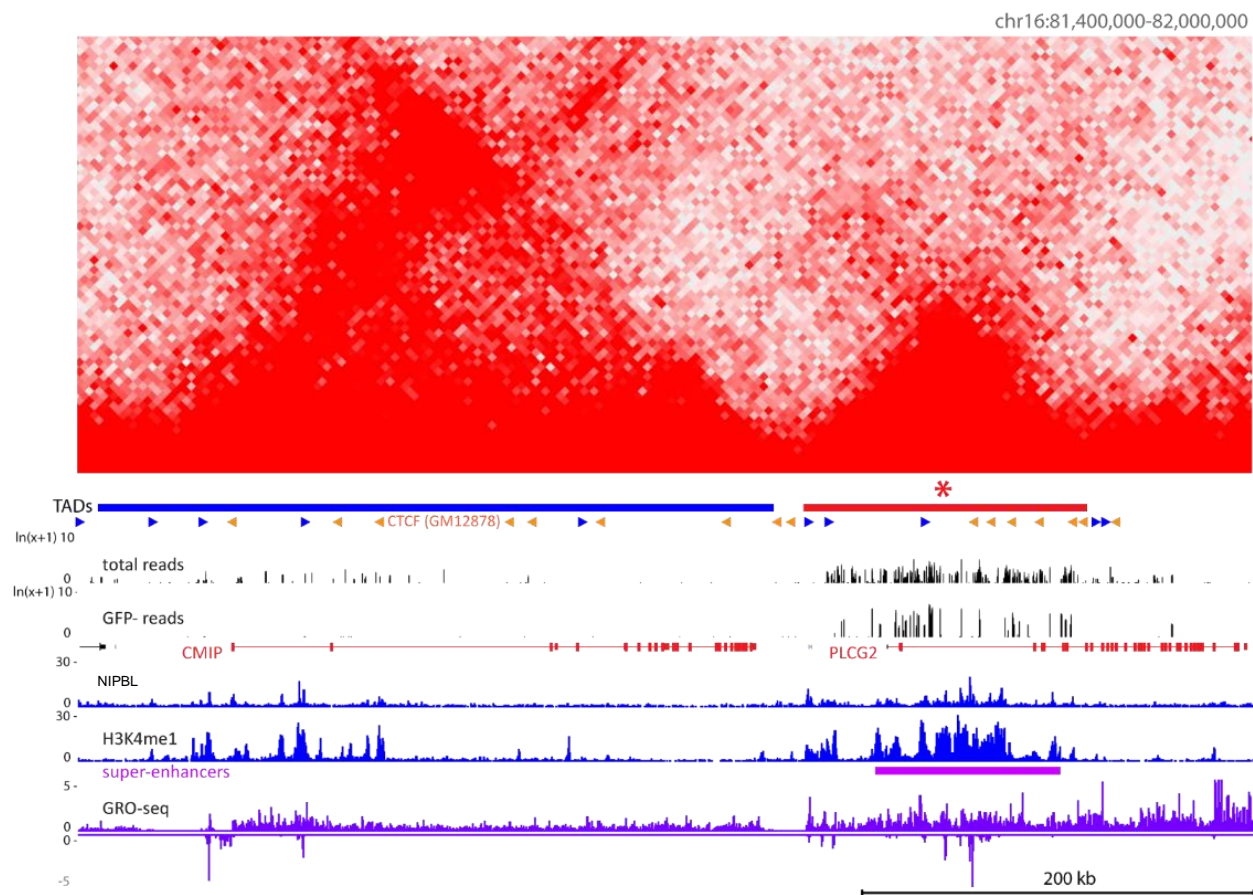

H

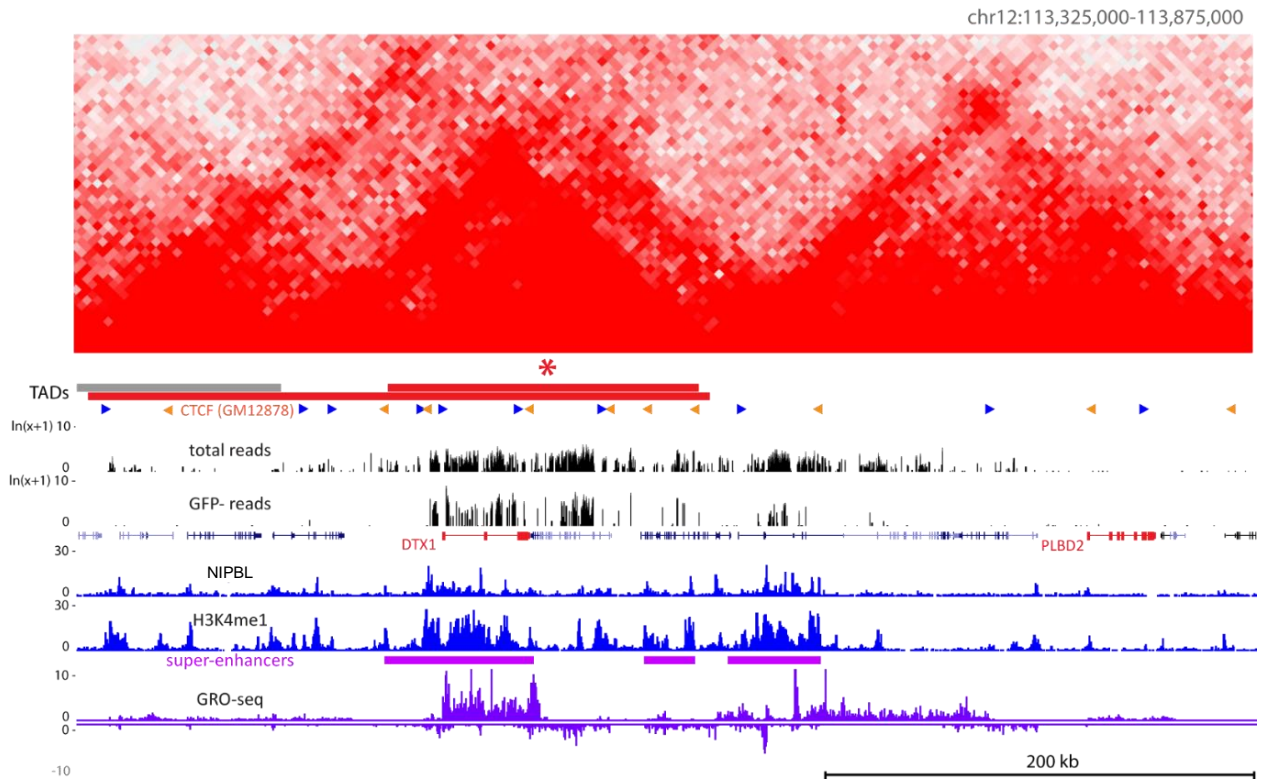

### **Data S1** - Examples of SHM-susceptible (hot) and SHM-resistant (cold) TADs *Related to Figure 3*

(A-H) Hi-C matrices are shown above DIVAC-trap HTISA data for cold (blue) and hot (red) TADs, with high confidence hot and cold TADs marked with an asterisk. CTCF motif orientations (sense, blue; antisense, orange) overlapping with CTCF ChIP-seq peaks for the GM12878 human lymphoblastic cell line are indicated, with data tracks for NIPBL, H3K4me1, super-enhancers, and GRO-seq (sense and antisense above and below the line, respectively). (A-C) Examples of hot and cold TADs close to each other. (D-F) Examples of cold regions. (G) Example of juxtaposed hot and cold TADs. (H) Example of hot region with hot TAD in which SHM-susceptibility is sharply delimited to one sub-TAD.
